# Supplementary material
Source: publisher figshare collection journal article supplement (https://sage.figshare.com/ndownloader/files/22728917)
Supplement: Supplementary file 1 [file 22728917]

## APPENDIX

### ADD HEALTH CHILDHOOD ADHD SYMPTOM QUESTIONS

Specific ADHD symptom questions from Wave 3 of the National Longitudinal Study of Adolescent to Adult Health (Add Health) were as follows:

- For **Impulsivity/Hyperactivity** (shortened to just *hyperactivity* throughout this article): (1) When you were between 5 and 12, you blurted out answers before the questions had been completed; (2) When you were between 5 and 12, you felt “on the go” or “driven by a motor”; (3) When you were between 5 and 12, you felt restless; (4) When you were between 5 and 12, you fidgeted with your hands or feet or squirmed in your seat; (5) When you were between 5 and 12, you had difficulty awaiting your turn; (6) When you were between 5 and 12, you had difficulty doing fun things quietly; (7) When you were between 5 and 12, you had difficulty organizing tasks and activities; (8) When you were

between 5 and 12, you left your seat in the classroom or in other situations when being seated was expected; (9) When you were between 5 and 12, you talked too much.

- For **Inattentiveness**: (1) When you were between 5 and 12, you avoided, disliked, or were reluctant to engage in work requiring sustained mental effort; (2) When you were between 5 and 12, you didn’t follow through on instructions and failed to finish work; (3) When you were between 5 and 12, you didn’t listen when spoken to directly; (4) When you were between 5 and 12, you failed to pay close attention to details or made careless mistakes in your work; (5) When you were between 5 and 12, you had difficulty sustaining your attention in tasks or fun activities; (6) When you were between 5 and 12, you were easily distracted; (7) When you were between 5 and 12, you were forgetful; (8) When you were between 5 and 12, you lost things that were necessary for tasks or activities.
